# Supplementary material for: Using the ‘SMART’ Framework to Analyze Quality of Nonprofit Hospitals’ Implementation Plans
Source: Research Square preprint supplement (doi:10.21203/rs.3.rs-7465807/v1), 2025-09-30

**APPENDIX A.**

**Community Health Needs Assessment (CHNA) and Implementation Plan (IP) Evaluation Codebook**

1. **IP describes at least 1 quantifiable measure (regardless of numeric target)**

At least 1 implementation strategy or project has some defined numerical metric to track progress or achievement. For example, “increasing health literacy in the community” would not earn this question a point since it does not describe a quantifiable way to track progress or improvement in health literacy. Can think of this like “specific” and “measurable” in the SMART Goal framework (see below).

**Note:** This applies strictly to numeric outcomes and *would not* include binary actions like enactment of a new program or entity

Examples that meet this criterion:

- Number of attendees
- Hiring additional staff
- Blood pressure measurement
- Number of community partnerships formed (must be concrete)

Examples that do not meet this criterion:

- Implementing a 3-year data agreement
- Creating a plan to incorporate evidence-based practices in a clinic
- Launching a new residency program
- Increasing community engagement
- Increasing community partnerships (without clearly identifying the partnership as a metric)

1. **At least 50% of strategies have quantifiable measures (regardless of numeric target)**

See above, but ³ 50% of strategies or plans have defined quantifiable measures by which to track success. In some cases, metrics may not match up 1:1 with a specific strategy.

Credit the IP if at least 50% of strategies could be tracked using the quantifiable measures listed.

1. **At least 1 strategy has a quantifiable measure associated with a numeric goal**

IP contains at least 1 strategy with quantifiable measure (as defined in section 1) with an associated aspirational target. A successful pairing of an outcome measure with a target can be called a “numeric goal”. Binary actions like those defined in section 1 would not constitute “numeric goals.” Can think of this like “Measurable” and “Achievable” in the Smart Goal framework (see below).

Examples that meet this criterion:

- Increase attendees by 35%
- 25 attendees at community fair

Examples that do not meet this criterion:

- Decrease the substance abuse rate in the county
- Decrease ED utilization
- Quantifiable metrics in isolation
- Developing a dashboard

1. **At least 50% of strategies have quantifiable measures associated with numeric goals**

See sections 2 and 3 for clarification. Goals and strategies may not match up 1:1. In these cases, tally yes if 50% of the strategies have a goal attached.

1. **IP identifies at least one collaborative partnership**

IP identifies a strategic partner for a specific implementation strategy or group thereof. Partnerships listed in other areas of the IP that are not clearly tied to a specific strategy or group do not count.

1. **IP clearly delineates hospital resources committed to at least one implementation strategy**

IP must clearly specify committed resources for a specific strategy. Broader statements about committed resources elsewhere in the IP do not count. General statements such as “[hospital] funding] do receive credit as long as they are clearly tied to a specific strategy or group thereof.

1. **IP describes at least 2 clearly identified new initiatives or measurable expansion of prior strategies that benefit the community**

Strategies that clearly represent expansion (e.g., clearly identified creation of new initiatives, or referencing how existing initiatives are evolving year over year) should receive credit. They must directly or indirectly benefit the *community,* rather than the organization itself. Thus, business and/or logistical expansions for hospital workflow should not be counted (e.g., creating a business plan, expanding a research program, creating a report).

Strategies that are unclear or not explicitly shown to be new or evolving should not receive credit. Goals that are vague should be not counted as meeting this criterion. Binary actions were excluded from the “numeric goal” criteria may be included here (e.g. launching a residency program would count).

Examples that meet this criterion:

- Increase fair attendance by 25% since last year
- Create a new diabetes teaching curriculum
- Launch a new residency program
- Implement a new process program
- Develop a health equity dashboard
- Invest $1 million *more* into community development

Examples that do not meet this criterion:

- “Continue,” “maintain,” “engage” are verbs that do not indicate clear expansion
- Identify/research/explore the drivers of ED utilization
- Creation of a hospital business plan
- Establish a new community partnership

1. **CHNA evaluates community impact since prior CHNA**

CHNAs that mention of the need to evaluate or that an evaluation is ongoing will not receive credit. The CHNA must discuss the progress made or whether prior goals were met for at least 1 prior implementation strategy to receive credit. **Listing programs or events held would count.** This information can usually be found in the CHNA document. Can think of this as “Time-Bound” in the SMART goal framework.

1. **CHNA evaluation reported at least 1 quantifiable metric in their evaluation**

A quantifiable measure was reported for a specific implementation *strategy* as part of the evaluation. General statements about patients served that are not specific or associated with a strategy do not count as meeting this criteria.

Examples that meet this criterion:

- Conducted 5 health fairs
- Enrolled 2,000 patients
- Hired 3 staff members

Examples that do not meet this criterion:

- Improved health literacy levels in the community
- Worked with community partners to distribute meals
- Housed healthcare workers during the Covid-19 pandemic


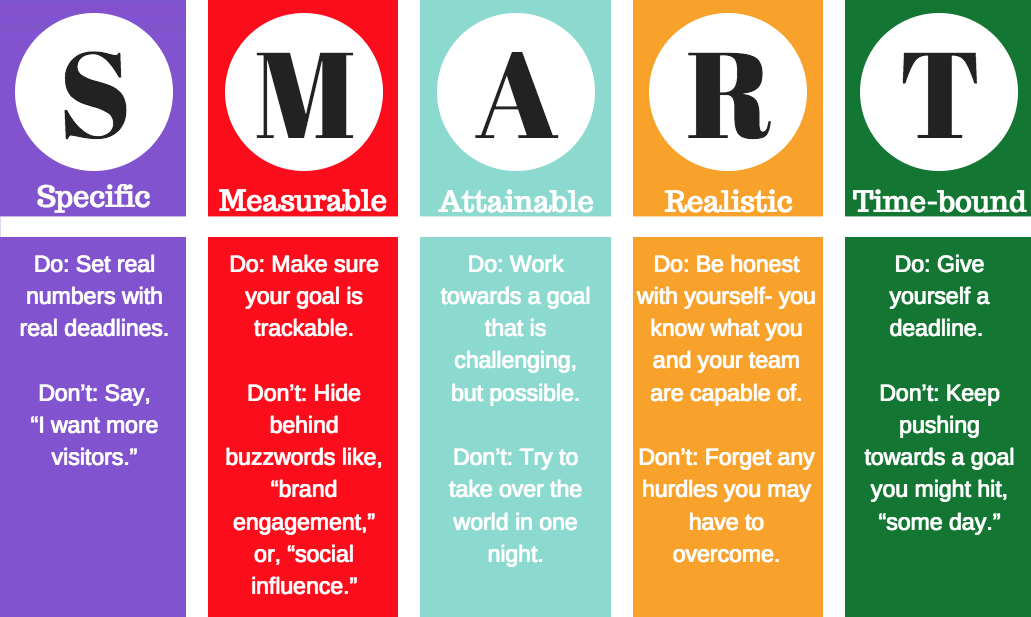

Supplement: Supplementary file 1 [file 54dd6c304f8a00d14a29c60f.docx]
